# Supplementary material for: Not all cemented hips are the same: a register-based (NJR) comparison of taper-slip and composite beam femoral stems
Source: PubMed Central journal article supplement (PMC6534220; doi:10.1080/17453674.2019.1582680), 2019-03-06
Supplement: IORT_A_1582680_SM2404.pdf [file IORT_A_1582680_SM2404.pdf]

## Supplementary data

### Disclaimer

The views expressed represent those of the authors and do not necessarily reflect those of the National Joint Registry Steering Committee or the Health Quality Improvement Partnership (HQIP) who do not vouch for how the information is presented.

The Healthcare Quality Improvement Partnership (“HQIP”) and/or the National Joint Registry (“NJR”) take no responsibility for the accuracy, currency, reliability, and correctness of any data used or referred to in this report, nor for the accuracy, currency, reliability, and correctness of links or references to other information sources and disclaims all warranties in relation to such data, links, and references to the maximum extent permitted by legislation.

HQIP and NJR shall have no liability (including but not limited to liability by reason of negligence) for any loss, damage, cost, or expense incurred or arising by reason of any person using or relying on the data within this report and whether caused by reason of any error, omission, or misinterpretation in the report or otherwise. This report is not to be taken as advice. Third parties using or relying on the data in this report do so at their own risk and will be responsible for making their own assessment and should verify all relevant representations, statements, and information with their own professional advisers.

Table 2. Stem type and brand frequencies

| Stem                     | Frequency |
|--------------------------|-----------|
| <b>Taper-slip</b>        |           |
| Exeter V40               | 175,472   |
| CPT                      | 29,512    |
| C-Stem Cemented Stem     | 17,477    |
| C-Stem AMT Cemented Stem | 8,994     |
| MS-30                    | 3,415     |
| CPCS                     | 2,468     |
| CPS Plus                 | 2,119     |
| Furlong Cemented Stem    | 1,877     |
| Taperfit Cemented Stem   | 1,313     |
| Taperloc Cemented Stem   | 1,034     |
| Olympia                  | 904       |
| Exeter                   | 886       |
| Ultima TPS Stem          | 176       |
| Aeon Cemented Stem       | 261       |
| Profemur Cemented Stem   | 241       |
| Corail Cemented          | 135       |
| Edinburgh                | 117       |
| Total                    | 245,401   |
| <b>Composite beam</b>    |           |
| Charnley Cemented Stem   | 22,015    |
| Stanmore Modular Stem    | 7,016     |
| Muller-Biomet            | 3,107     |
| Muller Straight Stem     | 2,481     |
| SP II Cemented Stem      | 2,372     |
| Elite Plus Cemented Stem | 1,719     |
| Omnifit Cemented Stem    | 1,513     |
| CCA Cemented Stem        | 1,302     |
| Charnley Modular         | 1,126     |
| P10 Muller               | 838       |
| Spectron                 | 838       |
| Centrament               | 671       |
| VerSys Cemented Stem     | 623       |
| CMK Cemented Stem        | 561       |
| Excia Cemented           | 438       |
| Ultima Straight Stem     | 396       |
| Mem                      | 371       |
| Stanmore Monobloc Stem   | 237       |
| Bimetric Cemented (Ti)   | 209       |
| Hi-Nek Cemented Stem     | 129       |
| Summit Cemented Stem     | 108       |
| Bimetric Cemented (CoCr) | 104       |
| Total                    | 47,586    |

Table 3. Comparison of taper-slip and composite beam stems

| Factor           | Stem type       |                | p-value              |
|------------------|-----------------|----------------|----------------------|
|                  | Taper-slip      | Composite beam |                      |
| Number           | 245,401 (83.8%) | 47,586 (16.2%) | n/a                  |
| Mean age (range) | 71.9 (12–103)   | 73.6 (15–101)  | < 0.001 <sup>a</sup> |
| Death, n (%)     | 25,761 (10.5)   | 8,168 (17.2)   | < 0.001 <sup>b</sup> |
| Revised, n (%)   | 3,080 (1.3)     | 810 (1.7)      | < 0.001 <sup>b</sup> |

<sup>a</sup> ANOVA  
<sup>b</sup>  $\chi^2$  test

Table 4. Breakdown by stem type. Values are frequency (%) unless otherwise stated

|                             | Taper-slip     |               | Composite beam |               | p-value              |                      |
|-----------------------------|----------------|---------------|----------------|---------------|----------------------|----------------------|
|                             | Exeter         | All other     | Charnley       | All other     | 2 groups             | 4 groups             |
| Number                      | 176,358        | 69,043        | 23,141         | 24,445        | N/A                  | N/A                  |
| Age in years (range)        | 71.8 (12–100)  | 72.2 (15–103) | 72.9 (19–101)  | 74.3 (15–101) | < 0.001 <sup>a</sup> | < 0.001 <sup>a</sup> |
| Death                       | 18,234 (10.3)  | 7,527 (10.9)  | 4,215 (18.2)   | 3,953 (16.2)  | < 0.001 <sup>b</sup> | < 0.001 <sup>b</sup> |
| Revised                     | 2,108 (1.2)    | 972 (1.4)     | 428 (1.8)      | 382 (1.6)     | < 0.001 <sup>b</sup> | < 0.001 <sup>b</sup> |
| Sex                         |                |               |                |               | < 0.001 <sup>b</sup> | < 0.001 <sup>b</sup> |
| Male                        | 62,345 (35.4)  | 23,137 (33.5) | 8,174 (35.3)   | 7,694 (31.5)  |                      |                      |
| Female                      | 114,012 (64.6) | 45,903 (66.5) | 14,967 (64.7)  | 16,750 (68.5) |                      |                      |
| ASA Grade                   |                |               |                |               | < 0.001 <sup>b</sup> | < 0.001 <sup>b</sup> |
| 1                           | 24,911 (14.1)  | 8,769 (12.7)  | 3,443 (14.9)   | 3,727 (13.6)  |                      |                      |
| 2                           | 120,756 (68.5) | 48,327 (70.0) | 15,043 (65.0)  | 16,859 (69.0) |                      |                      |
| 3                           | 29,577 (16.8)  | 11,497 (16.7) | 4,436 (19.2)   | 4,077 (16.7)  |                      |                      |
| 4                           | 1,073 (0.6)    | 436 (0.6)     | 210 (0.9)      | 169 (0.7)     |                      |                      |
| 5                           | 41 (0.02)      | 14 (0.02)     | 9 (0.04)       | 13 (0.1)      |                      |                      |
| Procedure type              |                |               |                |               | < 0.001 <sup>b</sup> | < 0.001 <sup>b</sup> |
| Routine                     | 168,339 (95.5) | 65,662 (95.1) | 19,466 (84.1)  | 21,894 (89.6) |                      |                      |
| Complex                     | 8,019 (4.5)    | 3,381 (4.9)   | 3,675 (15.9)   | 2,551 (10.4)  |                      |                      |
| Diagnosis                   |                |               |                |               | < 0.001 <sup>b</sup> | < 0.001 <sup>b</sup> |
| Osteoarthritis              | 158,824 (90.1) | 62,244 (90.2) | 21,341 (92.2)  | 22,351 (91.4) |                      |                      |
| Other arthritides           | 2,651 (1.5)    | 943 (1.4)     | 403 (1.7)      | 319 (1.3)     |                      |                      |
| Previous trauma             | 2,313 (1.3)    | 876 (1.3)     | 212 (0.9)      | 317 (1.3)     |                      |                      |
| Acute trauma                | 4,489 (2.5)    | 1,579 (2.3)   | 229 (1.0)      | 596 (2.4)     |                      |                      |
| Previous hip surgery        | 328 (0.2)      | 172 (0.2)     | 13 (0.1)       | 23 (0.1)      |                      |                      |
| Childhood disease           | 1,807 (1.0)    | 820 (1.2)     | 103 (0.4)      | 116 (0.5)     |                      |                      |
| Avascular head necrosis     | 4,293 (2.4)    | 1,871 (2.7)   | 618 (2.7)      | 524 (2.1)     |                      |                      |
| Other (including infection) | 1,653 (0.9)    | 538 (0.8)     | 222 (1.0)      | 199 (0.8)     |                      |                      |
| Approach                    |                |               |                |               | < 0.001 <sup>b</sup> | < 0.001 <sup>b</sup> |
| Transgluteal                | 73,779 (41.0)  | 26,466 (38.3) | 16,638 (71.9)  | 14,028 (57.4) |                      |                      |
| Posterior                   | 92,779 (52.6)  | 36,047 (52.2) | 1,442 (6.2)    | 6,906 (28.3)  |                      |                      |
| Trochanteric osteotomy      | 91 (0.1)       | 1,272 (1.8)   | 680 (2.9)      | 24 (0.1)      |                      |                      |
| Other                       | 5,225 (3.0)    | 2,721 (3.9)   | 914 (3.9)      | 1,161 (4.7)   |                      |                      |
| Missing                     | 5,934 (3.4)    | 2,527 (3.7)   | 3,467 (15.0)   | 2,326 (9.5)   |                      |                      |
| Bearing                     |                |               |                |               |                      |                      |
| Metal-on-polyethylene       | 155,028 (87.9) | 58,315 (84.5) | 22,728 (98.2)  | 21,633 (88.5) |                      |                      |
| Ceramic-on-ceramic          | 12,192 (6.9)   | 3,392 (4.9)   | 252 (1.1)      | 494 (2.0)     |                      |                      |
| Ceramic-on-polyethylene     | 8,853 (5.0)    | 7,251 (10.5)  | 160 (0.7)      | 2,300 (9.4)   |                      |                      |
| Ceramic-on-metal            | 285 (0.2)      | 85 (0.1)      | 1 (0.004)      | 18 (0.1)      | < 0.001 <sup>b</sup> | < 0.001 <sup>b</sup> |

<sup>a</sup> ANOVA<sup>b</sup>  $\chi^2$  test

Table 7. Hazard ratios (HR), 95% confidence intervals, and significance levels for the Cox regression model, adjusted for known confounders. Only cases with no missing values included in the model

| Variable (reference variable) | n       | HR (95% CI)                     | p-value |
|-------------------------------|---------|---------------------------------|---------|
| Age at primary                |         | 0.98 (0.97–0.98)                | < 0.001 |
| Sex                           |         |                                 |         |
| Male                          | 101,343 | Reference                       |         |
| Female                        | 191,623 | 0.78 (0.73–0.83)                | < 0.001 |
| Stem type                     |         |                                 | < 0.001 |
| Exeter                        | 176,350 | Reference                       |         |
| All other taper-slip          | 69,036  | 1.21 (1.12–1.30)                | < 0.001 |
| Charnley                      | 23,140  | 1.15 (1.03–1.28)                | 0.01    |
| All other composite beam      | 24,440  | 1.19 (1.06–1.33)                | 0.003   |
| Diagnosis                     |         |                                 | < 0.001 |
| Osteoarthritis                | 264,745 | Reference                       |         |
| Other arthritides             | 4,315   | 1.23 (0.98–1.54)                | 0.07    |
| Previous trauma               | 3,718   | 1.47 (1.13–1.90)                | 0.004   |
| Acute trauma                  | 6,890   | 1.84 (1.52–2.22)                | < 0.001 |
| Previous hip surgery          | 536     | 1.44 (0.75–2.78)                | 0.3     |
| DDH/childhood disease         | 2,846   | 0.77 (0.56–1.07)                | 0.1     |
| Avascular head necrosis       | 7,305   | 1.44 (1.22–1.70)                | < 0.001 |
| Other (including infection)   | 2,611   | 1.38 (1.03–1.85)                | 0.03    |
| ASA grade                     |         |                                 | < 0.001 |
| 1                             | 40,449  | Reference                       |         |
| 2                             | 200,973 | 1.20 (1.09–1.32)                | < 0.001 |
| 3                             | 49,580  | 1.32 (1.18–1.49)                | < 0.001 |
| 4                             | 1,887   | 1.17 (0.76–1.82)                | 0.5     |
| 5                             | 77      | 0.001 (0–2.3x10 <sup>21</sup> ) | 0.8     |
| Procedure type                |         |                                 |         |
| Routine                       | 275,341 | Reference                       |         |
| Complex                       | 17,625  | 0.99 (0.76–1.25)                | 0.9     |
| Approach                      |         |                                 | 0.1     |
| Posterior                     | 137,176 | Reference                       |         |
| Trans gluteal                 | 129,450 | 0.93 (0.87–1.00)                | 0.049   |
| Trochanteric osteotomy        | 2,067   | 1.14 (0.79–1.64)                | 0.5     |
| Other                         | 10,020  | 0.83 (0.67–1.03)                | 0.09    |
| Missing/unknown               | 14,253  | 0.83 (0.64–1.08)                | 0.2     |
| Bearing                       |         |                                 | < 0.001 |
| Metal-on-polyethylene         | 257,685 | Reference                       |         |
| Ceramic-on-ceramic            | 16,330  | 0.68 (0.58–0.79)                | < 0.001 |
| Ceramic-on-polyethylene       | 18,562  | 0.61 (0.52–0.71)                | < 0.001 |
| Ceramic-on-metal              | 389     | 1.39 (0.74–2.58)                | 0.3     |
